# Supplementary material
Source: PubMed Central journal article supplement (PMC3080999)
Supplement: 1018331108_pnas.201018331SI.pdf [file 1018331108_pnas.201018331SI.pdf]

# Supporting Information

Mankan et al. 10.1073/pnas.1018331108

## SI Materials and Methods

**Mice.** *Ikk $\beta^{\Delta}$*  mice were crossed with *Tnfr $^{-/-}$* , *Il1r $^{-/-}$* , *Rag1 $^{-/-}$* , or NU-*Foxn1 $^{nu}$*  mice (all purchased from Jackson Laboratory), or *Asc $^{-/-}$*  (1) and *Nlrp3 $^{-/-}$*  (2) to generate respective compound mutants. All mice were on a mixed genetic background and, in all experiments, Cre-negative littermate controls (*Ikk $\beta^{F/F}$* ) were used. *Prtn3/Ela2 $^{-/-}$*  (3) and *Casp1 $^{-/-}$*  mice (4) were on a C57/B6 background. To induce deletion of *Ikk $\beta$* , mice were injected once with 250  $\mu$ L of poly(I:C) (Sigma) i.p. and were generally analyzed after 21 d unless stated otherwise. Littermate controls received the same amount of poly(I:C). In neutralization experiments, 10  $\mu$ g of rat  $\alpha$ -G-CSF (MAB414; R&D Systems) or rat IgG1 isotype control (MAB 005; R&D Systems) were injected i.p. daily for 21 d. For ex vivo culture of bone marrow cells, total bone marrow was flushed from the hind limbs followed by RBC lysis. Cells ( $1 \times 10^6$ ) were stimulated with TNF- $\alpha$  (Peprotech) for 24 h in RPMI media containing 10% bovine FCS and 1% penicillin/streptomycin. ML120B was provided by Millenium Pharmaceuticals.

**Flow Cytometry and Cell Separation.** The following antibodies were used for FACS analysis: FITC-labeled anti-CD11b (BD Biosciences), PE-labeled anti-Gr-1 (eBioscience), FITC-labeled anti-CD34 (eBioscience), PE-labeled anti-Fc $\gamma$ RII/III (eBioscience), APC-labeled anti-c-Kit (eBioscience), APC-Cy7-labeled anti-Sca-1 (BD Biosciences), APC-labeled anti-IL-7R $\alpha$  (eBioscience), PerCP Cy5.5-labeled anti-IL-7R $\alpha$  (eBioscience), PE-labeled anti-F4/80 (eBioscience), APC-labeled anti-IL-17 (eBioscience), FITC-labeled anti-CD3 (BD Biosciences), and FITC-labeled anti-CD4 (BD Biosciences). Annexin V (BD Biosciences) was used to quantify apoptotic cells. IL-7R $\alpha^+$  and IL-7R $\alpha^-$ , as well as CD34 $^+$  and CD34 $^-$ , cells were purified by using respective antibodies and magnetically separated by using anti-APC (IL-7R $\alpha$ ) or anti-FITC (CD34) microbeads according to the manufacturer's instructions (Miltenyi Biotec).

For detection of intracellular IL-17, MLN cells were isolated and stimulated with PMA (50 ng/mL) and ionomycin (500 ng/mL) in the presence of Golgi Plug (BD Pharmingen) for 4 h before permeabilization and staining. FACS data were acquired on a BD FACSCalibur (Becton Dickinson) and analyzed using FlowJo software (TreeStar). Myeloid progenitors were identified on a Gallios flow cytometer and data were analyzed by using Kaluza software (Beckman Coulter).

**In Vitro T-Cell Differentiation.** T cells were isolated by using the CD4 $^+$  T Cell Isolation Kit II (Miltenyi Biotech) and incubated in anti-CD3 (4  $\mu$ g)/anti-CD28 (2  $\mu$ g)-coated plates in the presence of recombinant mouse IL-6, IL-23, TGF- $\beta$ , and IL-1 $\beta$  (Peprotech).

**Protein and RNA Analysis.** For immunoblot analysis, the following antibodies were used: IL-1 $\beta$  (R&D Systems), IKK $\beta$  (UBI), and  $\beta$ -actin (Sigma). IL-1 $\beta$ , IL-6, IL-17, IFN- $\gamma$ , and G-CSF levels in plasma and cell culture supernatants were measured using the respective DuoSet ELISA system (R&D Systems). RNA isolation and cDNA synthesis was performed as previously described (1), and real-time PCR analysis with a Power SYBR Green PCR Master Mix (Applied Biosystems) was performed on a StepOne Plus Real-Time PCR system (Applied Biosystems). RNA levels were normalized to cyclophilin levels and calculated as  $2^{-(Ct \text{ cyclophilin} - Ct \text{ gene of interest})}$  and plotted as arbitrary units on a linear scale. Primer sequences are available on request.

**Induction of EAE.** Twenty-one days after poly(I:C) administration, *Ikk $\beta^{F/F}$*  and *Ikk $\beta^{\Delta}$*  were immunized s.c. at the dorsal flanks with 100  $\mu$ g of MOG<sub>35–55</sub> peptide (MEVGWYRSPFSRVVH-LYRNGK) emulsified in complete Freund adjuvant (250  $\mu$ g of *Mycobacterium* extract H37Ra per mouse). Pertussis toxin (200 ng) was given i.p. on days 0 and 2 after immunization. Occurrence of EAE was clinically scored when the mice had developed a limp tail or gait alterations (5). For MOG recall experiments, *Ikk $\beta^{F/F}$*  and *Ikk $\beta^{\Delta}$*  mice were killed on day 12 after MOG<sub>35–55</sub> immunization and draining lymph node cells were cultured in the presence of various concentrations of MOG<sub>33–55</sub> peptide. The supernatants were collected after 48 h of antigen reexposure for determination of cytokine secretion by ELISA and proliferation was determined by [ $^3$ H]-thymidine incorporation assay and compared with T cells that had not been rechallenged to determine stimulation index.

**Statistical Analysis.** Data are expressed as mean  $\pm$  SE. Differences were analyzed by log-rank or Student *t* test by using Prism software, version 4 (GraphPad Software). A *P* value  $\leq$  0.05 was considered significant.

1. Mariathasan S, et al. (2004) Differential activation of the inflammasome by caspase-1 adaptors ASC and Ipaf. *Nature* 430:213–218.
2. Martinon F, Pétrilli V, Mayor A, Tardivel A, Tschopp J (2006) Gout-associated uric acid crystals activate the NALP3 inflammasome. *Nature* 440:237–241.
3. Kessenbrock K, et al. (2008) Proteinase 3 and neutrophil elastase enhance inflammation in mice by inactivating antiinflammatory progranulin. *J Clin Invest* 118: 2438–2447.

4. Li P, et al. (1995) Mice deficient in IL-1 beta-converting enzyme are defective in production of mature IL-1 beta and resistant to endotoxic shock. *Cell* 80:401–411.
5. Korn T, et al. (2007) Myelin-specific regulatory T cells accumulate in the CNS but fail to control autoimmune inflammation. *Nat Med* 13:423–431.

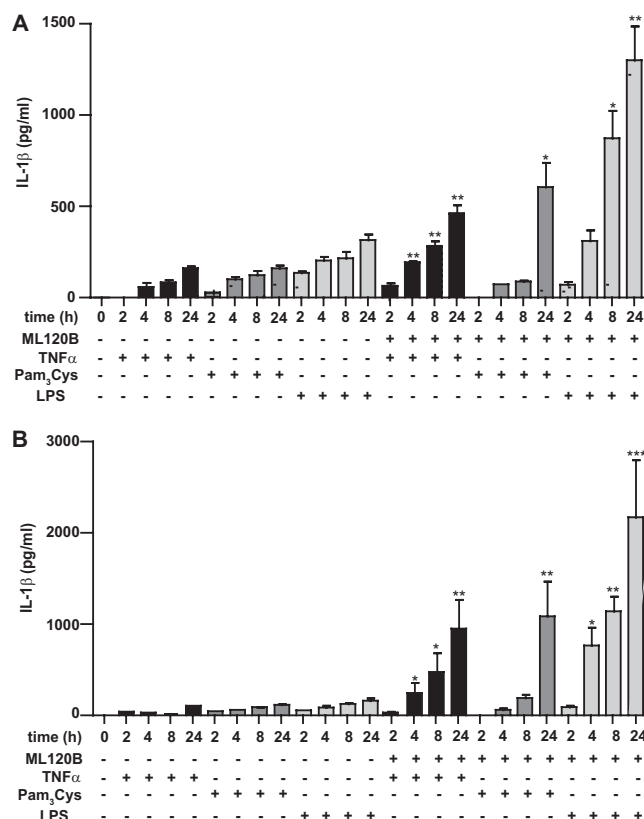

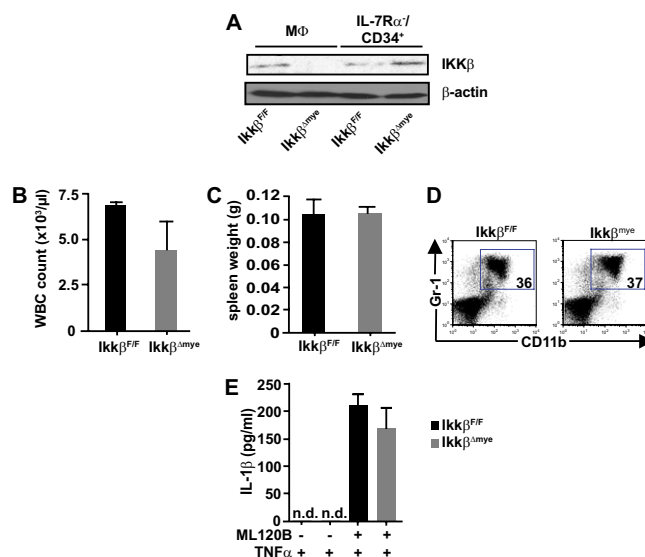

**Fig. S3.** (A) Immunoblot analysis of IKK $\beta$  in peritoneal macrophages (M $\Phi$ ) or IL-7R<sup>-</sup>/CD34<sup>+</sup> progenitor cells of *Ikk $\beta$ <sup>F/F</sup>* and *Ikk $\beta$  <sup>$\Delta$ mye</sup>* mice confirming deletion of IKK $\beta$  in differentiated macrophages and lack of deletion in progenitor cells. (B and C) WBC counts (B) and spleen weights (C) of *Ikk $\beta$ <sup>F/F</sup>* and *Ikk $\beta$  <sup>$\Delta$ mye</sup>* KO mice. Data are mean  $\pm$  SE from at least three mice. (D) Representative FACS plots of CD11b<sup>+</sup>/Gr-1<sup>+</sup> cells in bone marrow of *Ikk $\beta$ <sup>F/F</sup>* and *Ikk $\beta$  <sup>$\Delta$ mye</sup>* KO mice. Plots are representative of four animals per genotype. Mean values  $\pm$  SE for *Ikk $\beta$ <sup>F/F</sup>*: 35.6%  $\pm$  0.7; *Ikk $\beta$  <sup>$\Delta$ mye</sup>*, 36.3%  $\pm$  1.3; *P* value not significant. (E) IL-1 $\beta$  levels in the supernatants of bone marrow cells from *Ikk $\beta$ <sup>F/F</sup>* and *Ikk $\beta$  <sup>$\Delta$ mye</sup>* KO mice treated with or without ML120B (30  $\mu$ M) and TNF- $\alpha$  (10 ng/mL) for 24 h. Data are mean  $\pm$  SE from at least three mice.

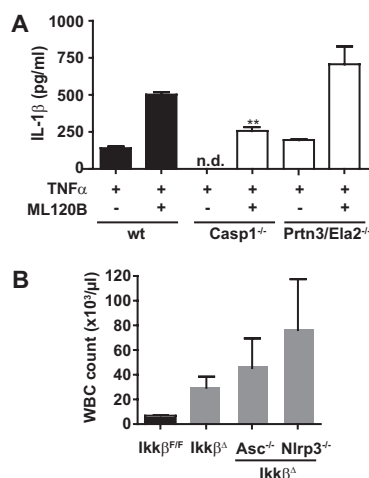

**Fig. S4.** (A) IL-1 $\beta$  levels in the supernatants of WT, *Casp1*<sup>-/-</sup>, or *Prtn3/Ela2*<sup>-/-</sup> bone marrow cells stimulated with TNF- $\alpha$  (10 ng/mL) and ML120B (30  $\mu$ M). Data are mean  $\pm$  SE from at least three mice (\*\**P* < 0.01). (B) WBC counts of *Ikkg*<sup>fl/fl</sup>, *Ikkg* <sup>$\Delta$</sup> , *Ikkg* <sup>$\Delta$</sup> /*Asc*<sup>-/-</sup>, and *Ikkg* <sup>$\Delta$</sup> /*Nlrp3*<sup>-/-</sup> double KO mice 21 d after poly(I:C) administration. Data are mean  $\pm$  SE from at least three mice.

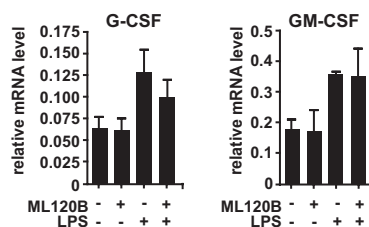

**Fig. S5.** Relative levels of G-CSF and GM-CSF mRNA in WT bone marrow-derived macrophages untreated or stimulated with LPS (100 ng/mL) for 4 h in the presence or absence of ML120B (30  $\mu$ M). Data are mean  $\pm$  SE from at least three mice.

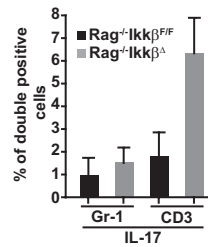

**Fig. S6.** Quantification of IL-17 expression in Gr1<sup>+</sup> and intracellular CD3<sup>+</sup> cells in *Rag1*<sup>-/-</sup> and *Ikkb*<sup>Δ</sup>/*Rag1*<sup>-/-</sup> compound. Data are mean ± SE from two mice.

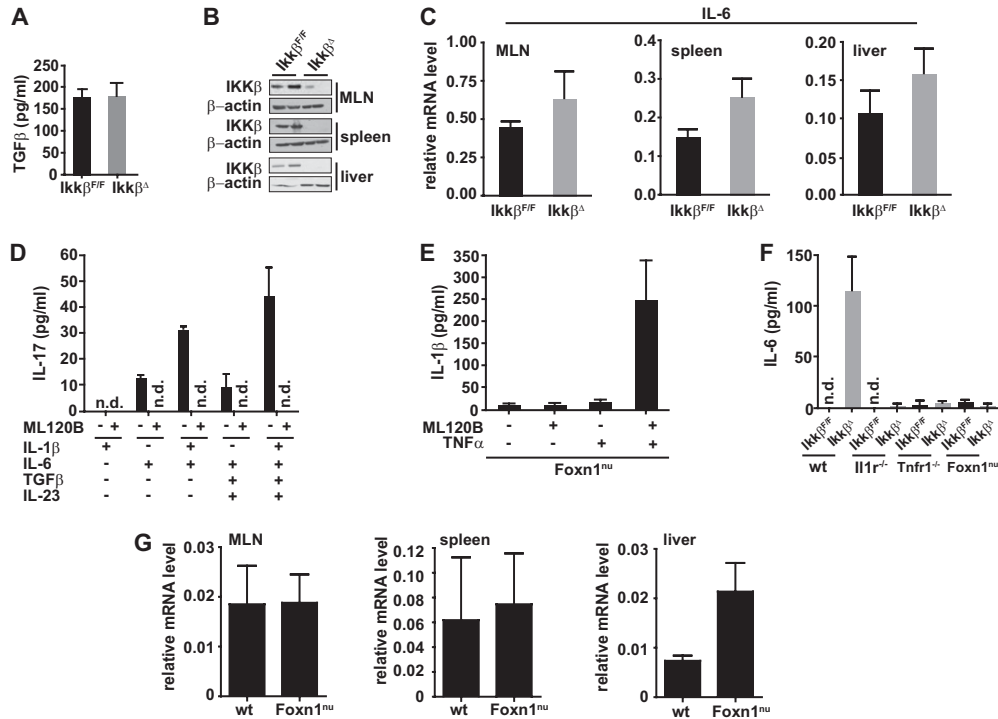

**Fig. S7.** (A) Plasma TGF- $\beta$  levels in *Ikkb*<sup>F/F</sup> and *Ikkb*<sup>Δ</sup> mice. Data are mean ± SE from at least six mice. (B) Confirmation of IKK $\beta$  deletion in MLN, spleen, and liver tissue of two independent *Ikkb*<sup>Δ</sup> mice compared with *Ikkb*<sup>F/F</sup> littermate controls by immunoblot analysis. (C) Relative levels of IL-6 mRNA in MLN, spleen, and liver tissue of *Ikkb*<sup>F/F</sup> and *Ikkb*<sup>Δ</sup> mice. Data are mean ± SE from at least three mice. (D) IL-17 levels in the supernatants of peripheral lymph node T cells incubated with or without ML120B (30  $\mu$ M) and stimulated either with single cytokines or a combination of IL-1 $\beta$  (10 ng/mL), IL-6 (50 ng/mL), TGF- $\beta$  (2 ng/mL), and IL-23 (1  $\mu$ g/mL) for 48 h. Results shown are from one representative experiment repeated at least four times. Data are mean ± SE from two animals. (E) IL-1 $\beta$  levels in supernatants of NU-*FcγR1*<sup>nu</sup> and NU-*FcγR1*<sup>nu</sup>/*Ikkb*<sup>Δ</sup> bone marrow cells stimulated with TNF- $\alpha$  (10 ng/mL) for 24 h in the presence or absence of ML120B (30  $\mu$ M). Data are mean ± SE from at least three mice. (F) Plasma IL-6 levels in *Ikkb*<sup>F/F</sup> and *Ikkb*<sup>Δ</sup> mice and in the respective *Il1r*<sup>-/-</sup>, *Tnfr*<sup>-/-</sup> and NU-*FcγR1*<sup>nu</sup> compound mutants 21 d after poly(I:C) injection. Data are mean ± SE from at least four mice (n.d., not detected). (G) Relative levels of IL-6 mRNA in MLN, spleen, and liver tissue of WT and NU-*FcγR1*<sup>nu</sup> mice. Data are mean ± SE from four mice.

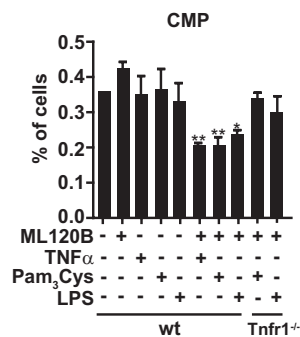

**Fig. S8.** Analysis of CMPs upon combined treatment with TNF $\alpha$ , Pam<sub>3</sub>Cys, or LPS with and without ML120B for 24 h in WT or *Tnfr1*<sup>-/-</sup> mice. Data are mean ± SE from three mice (\**P* < 0.05 and \*\**P* < 0.01 vs. respective samples without ML120B treatment).
